# Supplementary material for: DNA damage markers in dermal fibroblasts in vitro reflect chronological donor age
Source: PubMed Central journal article supplement (PMC4761719; doi:10.18632/aging.100890), 2016-01-30
Supplement: aging-08-147-s001.pdf [file aging-08-147-s001.pdf]

## SUPPLEMENTARY TABLES

**Supplementary Table 1. 53BP1 foci, TAF and micronuclei dependent on membership of a long-lived family.**

|                                                            | Familial longevity |              | P-value |
|------------------------------------------------------------|--------------------|--------------|---------|
|                                                            | Offspring          |              |         |
|                                                            | N=40               | N=40         |         |
| <b>Non-stressed state</b>                                  |                    |              |         |
| % nuclei with $\geq 1$ 53BP1 foci/nucleus                  | 47.3 (2.90)        | 48.1 (2.90)  | 0.730   |
| % nuclei with $\geq 2$ 53BP1 foci/nucleus                  | 13.9 (1.83)        | 14.7 (1.83)  | 0.565   |
|                                                            |                    |              |         |
| % nuclei with $\geq 1$ TAF/nucleus                         | 23.0 (1.62)        | 26.3 (1.62)  | 0.070   |
| % nuclei with $\geq 2$ TAF/nucleus                         | 5.18 (1.12)        | 5.43 (1.13)  | 0.862   |
|                                                            |                    |              |         |
| % cells with $\geq 1$ micronuclei/cell                     | 1.05 (0.17)        | 0.92 (0.14)  | 0.606   |
| % cells with $\geq 2$ micronuclei/cell                     | 0.09 (0.04)        | 0.10 (0.04)  | 0.897   |
|                                                            |                    |              |         |
| <b>Rotenone-stressed state</b>                             |                    |              |         |
| % nuclei with $\geq 1$ 53BP1 foci/nucleus                  | 47.8 (3.04)        | 49.4 (3.05)  | 0.487   |
| % nuclei with $\geq 2$ 53BP1 foci/nucleus                  | 19.3 (2.67)        | 20.5 (2.68)  | 0.543   |
|                                                            |                    |              |         |
| % nuclei with $\geq 1$ TAF/nucleus                         | 21.4 (1.49)        | 21.9 (1.51)  | 0.748   |
| % nuclei with $\geq 2$ TAF/nucleus                         | 3.97 (0.54)        | 4.76 (0.55)  | 0.232   |
|                                                            |                    |              |         |
| % cells with $\geq 1$ micronuclei/cell                     | 12.1 (0.61)        | 10.9 (0.63)  | 0.198   |
| % cells with $\geq 2$ micronuclei/cell                     | 2.06 (0.18)        | 1.81 (0.19)  | 0.343   |
|                                                            |                    |              |         |
| <b><math>\Delta</math> stressed and non-stressed state</b> |                    |              |         |
| % nuclei with $\geq 1$ 53BP1 foci/nucleus                  | 0.24 (2.96)        | 1.27 (2.97)  | 0.586   |
| % nuclei with $\geq 2$ 53BP1 foci/nucleus                  | 5.44 (1.94)        | 5.96 (1.95)  | 0.737   |
|                                                            |                    |              |         |
| % nuclei with $\geq 1$ TAF/nucleus                         | -1.50 (1.15)       | -4.01 (1.18) | 0.088   |
| % nuclei with $\geq 2$ TAF/nucleus                         | -1.09 (0.94)       | -0.62 (0.97) | 0.728   |
| % cells with $\geq 1$ micronuclei/cell                     | 11.0 (0.63)        | 10.1 (0.66)  | 0.295   |
| % cells with $\geq 2$ micronuclei/cell                     | 1.96 (0.18)        | 1.71 (0.19)  | 0.332   |

The adjusted estimated means within offspring and partners are given (linear mixed model, adjustment for gender, age, batch and repeated measurements). SE: standard error,  $\Delta$ : difference.

**Supplementary Table 2. 53BP1 foci, TAF and micronuclei dependent on presence of cardiovascular and/or metabolic diseases.**

|                                                            | Cardiovascular and/or<br>metabolic diseases |                 | P for trend <sup>a</sup> | P for trend <sup>b</sup> |
|------------------------------------------------------------|---------------------------------------------|-----------------|--------------------------|--------------------------|
|                                                            | Absent<br>N=52                              | Present<br>N=21 |                          |                          |
| <b>Non-stressed state</b>                                  |                                             |                 |                          |                          |
| % nuclei with $\geq 1$ 53BP1 foci/nucleus                  | 47.0 (2.60)                                 | 46.5 (3.11)     | 0.847                    | 0.487                    |
| % nuclei with $\geq 2$ 53BP1 foci/nucleus                  | 13.8 (1.38)                                 | 13.1 (1.69)     | 0.621                    | 0.493                    |
| % nuclei with $\geq 1$ TAF/nucleus                         | 24.6 (1.48)                                 | 23.3 (2.07)     | 0.589                    | 0.216                    |
| % nuclei with $\geq 2$ TAF/nucleus                         | 4.80 (1.00)                                 | 6.06 (1.46)     | 0.453                    | 0.337                    |
| % cells with $\geq 1$ micronuclei/cell                     | 1.07 (0.16)                                 | 0.95 (0.24)     | 0.689                    | 0.562                    |
| % cells with $\geq 2$ micronuclei/cell                     | 0.11 (0.03)                                 | 0.08 (0.05)     | 0.632                    | 0.764                    |
| <b>Rotenone-stressed state</b>                             |                                             |                 |                          |                          |
| % nuclei with $\geq 1$ 53BP1 foci/nucleus                  | 47.1 (2.78)                                 | 48.2 (3.40)     | 0.729                    | 0.775                    |
| % nuclei with $\geq 2$ 53BP1 foci/nucleus                  | 18.7 (2.35)                                 | 19.6 (2.87)     | 0.726                    | 0.849                    |
| % nuclei with $\geq 1$ TAF/nucleus                         | 21.7 (1.52)                                 | 20.2 (1.89)     | 0.399                    | 0.174                    |
| % nuclei with $\geq 2$ TAF/nucleus                         | 4.48 (0.53)                                 | 3.49 (0.71)     | 0.193                    | 0.077                    |
| % cells with $\geq 1$ micronuclei/cell                     | 11.6 (0.58)                                 | 11.6 (0.86)     | 0.977                    | 0.358                    |
| % cells with $\geq 2$ micronuclei/cell                     | 1.97 (0.17)                                 | 1.91 (0.25)     | 0.857                    | 0.992                    |
| <b><math>\Delta</math> stressed and non-stressed state</b> |                                             |                 |                          |                          |
| % nuclei with $\geq 1$ 53BP1 foci/nucleus                  | -0.01 (2.86)                                | 1.49 (3.25)     | 0.537                    | 0.675                    |
| % nuclei with $\geq 2$ 53BP1 foci/nucleus                  | 5.00 (1.88)                                 | 6.55 (2.28)     | 0.439                    | 0.805                    |
| % nuclei with $\geq 1$ TAF/nucleus                         | -2.37 (1.09)                                | -3.08 (1.55)    | 0.690                    | 0.851                    |
| % nuclei with $\geq 2$ TAF/nucleus                         | -0.22 (0.88)                                | -2.45 (1.31)    | 0.161                    | 0.067                    |
| % cells with $\geq 1$ micronuclei/cell                     | 10.6 (0.60)                                 | 10.6 (0.90)     | 0.961                    | 0.339                    |
| % cells with $\geq 2$ micronuclei/cell                     | 1.85 (0.17)                                 | 1.83 (0.25)     | 0.940                    | 0.864                    |

Only donors from the LLS were included in this analysis. The adjusted estimated means within both groups (disease absent or present) are given. Linear mixed model: model 1 (<sup>a</sup>) adjustment for gender, batch and repeated measurements. Model 2 (<sup>b</sup>): as model 1 plus adjustment for age and long-lived family member status. SE: standard error,  $\Delta$ : difference.
